# Supplementary material for: The pathway through LC-MS method development: in-house or ready-to-use kit-based methods?
Source: publisher site journal article supplement (doi:10.1515/cclm-2019-0916), 2020-02-18
Supplement: Supplementary file 1 [file cclm-2019-0916_suppl.docx]

|  | | **Precision( LC-MS/MS)** | | | | | | **Desirable imprecision EFLM database** |  |  |  |
| --- | --- | --- | --- | --- | --- | --- | --- | --- | --- | --- | --- |
| **Substance** | | **Intra-assay** | | | **Inter-assay** | | | **Range** | **LOD** | **LOQ** |
|  | | **Level 1** | **Level 2** | **Level 3** | **Level 1** | **Level 2** | **Level 3** |  |  |  |
|  | | | | | | | |  |  |  |  |
| Aldosterone | Concentration (µg/L) | 0.1 | 0.25 | 1.03 | 0.1 | 0.25 | 1.03 | **18.3%** | 0.025-6 | 0.007 | 0.025 |
|  | **CV(%)** | **2.6** | **3.8** | **2.3** | **2.6** | **4.5** | **3.9** |  |  |  |
| Corticosterone | Concentration (µg/L) | 0.83 | 3.99 | 30.3 | 0.83 | 3.99 | 30.3 | **15.0%** | 0.051-100 | 0.015 | 0.051 |
|  | **CV(%)** | **2.8** | **6.4** | **2.7** | **3.3** | **11.05** | **9.01** |  |  |  |
| Cortisol | Concentration (nmol/L) | 71.2 | 170.0 | 494.0 | 71.2 | 170.0 | 494.0 | **21.7%** | 0.667-1655 | 0.2 | 0.667 |
|  | **CV(%)** | **1.4** | **3.1** | **2.8** | **2.8** | **3.6** | **3.6** |  |  |  |
| Cortisone | Concentration (µg/L) | 2.06 | 12.3 | 29.3 | 2.06 | 12.3 | 29.3 | **15.0%** | 0.057-80 | 0.017 | 0.057 |
|  | **CV(%)** | **3.3** | **4.2** | **6.1** | **9.6** | **11.3** | **6.3** |  |  |  |
| 11-deoxycortisol | Concentration (µg/L) | 0.26 | 1.38 | 9.14 | 0.26 | 1.38 | 9.14 | **15.0%** | 0.014-30 | 0.004 | 0.014 |
|  | **CV(%)** | **3.7** | **5.5** | **2.8** | **3.9** | **5.8** | **4.1** |  |  |  |
| Androstenedione | Concentration (µg/L) | 0.28 | 1.16 | 9.3 | 0.28 | 1.16 | 9.3 | **15.0%** | 0.071-30 | 0.021 | 0.071 |
|  | **CV(%)** | **10.0** | **1.8** | **3.1** | **10.5** | **5.9** | **3.8** |  |  |  |
| DHEA | Concentration (µg/L) | 1.99 | 11.6 | 38.5 | 1.99 | 11.6 | 38.5 | **15.0%** | 0.236-120 | 0.167 | 0.236 |
|  | **CV(%)** | **1.8** | **1.3** | **1.5** | **4.7** | **2.98** | **2.35** |  |  |  |
| DHEAS | Concentration (µmol/L) | 0.69 | 4116.0 | 13.43 | 0.69 | 4116.0 | 13.43 | **10.5%** | 0.02-32.6 | 0.006 | 0.02 |
|  | **CV(%)** | **2.7** | **2.6** | **2.2** | **4.79** | **2.62** | **2.23** |  |  |  |
| Dihydrotestosterone | Concentration (µg/L) | 0.08 | 0.37 | 1.06 | 0.08 | 0.37 | 1.06 | **15.0%** | 0.079-3 | 0.029 | 0.079 |
|  | **CV(%)** | **13.51** | **2.13** | **2.52** | *22.2** | **2.5** | **2.78** |  |  |  |
| Estradiol | Concentration (ng/L) | 80.0 | 390.0 | 2460.0 | 80.0 | 390.0 | 2460.0 | ***6.8%*** | 37.2-10.000 | 11.1 | 37.2 |
|  | **CV(%)** | **2.0** | **1.3** | **1.8** | *8.0** | **4.0** | **2.6** |  |  |  |
| 17-Hydroxyprogesterone | Concentration (µg/L) | 0.31 | 1.53 | 9.01 | 0.31 | 1.53 | 9.01 | **9.8%** | 0.052-30 | 0.016 | 0.052 |
|  | **CV(%)** | **5.0** | **1.4** | **1.9** | **8.25** | **4.2** | **3.2** |  |  |  |
| Progesterone | Concentration (µg/L) | 0.32 | 3.26 | 15.6 | 0.32 | 3.26 | 15.6 | **15.0%** | 0.024-50 | 0.005 | 0.024 |
|  | **CV(%)** | **3.1** | **1.3** | **1.8** | **8.8** | **3.7** | **2.3** |  |  |  |
| Testosterone | Concentration (nmol/L) | 0.69 | 5.24 | 27.24 | 0.69 | 5.24 | 27.24 | **9.0%** | 0.043-83.2 | 0.013 | 0.043 |
|  | CV(%) | **3.3** | **1.2** | **1.9** | **8.7** | **4.2** | **3.4** |  |  |  |

Table 1 : Performances of the RTU kit (Precision, measuring range, LOD and LOQ). 15% imprecision was used when data from EFLM was not available according CLSI 62-A. *Values outside the desirable specification according to EFLM database are shown in Italic.

|  | | **Precision (IA-RIA)** | | | | | |  |  |  |  |
| --- | --- | --- | --- | --- | --- | --- | --- | --- | --- | --- | --- |
| **Substance** | | **Intra-assay** | | | **Inter-assay** | | | **Technique** | **Range** | **LOD** | **LOQ** |
|  | | **Level 1** | **Level 2** | **Level 3** | **Level 1** | **Level 2** | **Level 3** |  |  |  |  |
|  | |  |  |  |  |  |  |  |  |  |  |
| Aldosterone | Concentration (µg/L) | 0.0202 | 0.1106 | 0.7948 | 0.0202 | 0.1106 | 0.7948 | LC-MS | 0.0022-0.7948 | 0.0022 | 0.0138 |
|  | **CV(%)** | 3.6 | 3.5 | 2.8 | 4.8 | 3.5 | 2.8 |  |  |  |  |
| Corticosterone | Concentration (µg/L) |  |  |  |  |  |  |  |  |  |  |
|  | **CV(%)** |  |  |  |  |  |  |  |  |  |  |
| Cortisol | Concentration (nmol/L) | 3.09 | 283 | 1592 | 3.09 | 283 | 1592 | ECLIA | 1.5‑1750 | 1.5 | 3.0 |
|  | **CV(%)** | 5.4 | 1.5 | 1.6 | 10.1 | 2.2 | 1.9 |  |  |  |  |
| Cortisone | Concentration (µg/L) |  |  |  |  |  |  |  |  |  |  |
|  | **CV(%)** |  |  |  |  |  |  |  |  |  |  |
| 11-deoxycortisol | Concentration (µg/L) | 1.1 | 3.7 | 28.3 | 1.95 | 5.48 | 36.85 | RIA | 0.11-65 | 0.11 |  |
|  | **CV(%)** | 6.2 | 5.2 | 7.7 | 8.7 | 11.5 | 15.1 |  |  |  |  |
| Androstenedione | Concentration (µg/L) | 1.436 |  | 4.623 | 0.505 |  | 1.755 | RIA | 0.04-10 | 0.04 |  |
|  | **CV(%)** | 9.6 |  | 9.5 | 9.3 |  | 6.4 |  |  |  |  |
| DHEA | Concentration (µg/L) |  |  |  |  |  |  |  |  |  |  |
|  | **CV(%)** |  |  |  |  |  |  |  |  |  |  |
| DHEAS | Concentration (µmol/L) | 2.6 | 10.9 | 21.3 | 2.6 | 10.9 | 21.3 | ECLIA | 0.003‑27.0 | 0.003 | 0.0417 |
|  | **CV(%)** | 3.2 | 2.6 | 2.3 | 2.5 | 2.7 | 2.4 |  |  |  |  |
| Dihydrotestosterone | Concentration (µg/L) | 0.237 | 0.869 | 1.008 | 0.281 | 0.721 | 1.025 | ELISA | 0.006-2.5 | 0.006 |  |
|  | **CV(%)** | 11.4 | 5.5 | 3.9 | 12.1 | 7.5 | 5.9 |  |  |  |  |
| Estradiol | Concentration (ng/L) | 27.4 | 159 | 2720 | 27.4 | 159 | 2720 | ECLIA | 5‑3000 | 5.0 | 25.0 |
|  | **CV(%)** | 6.7 | 1.6 | 1.9 | 10.6 | 2.5 | 3.0 |  |  |  |  |
| 17-Hydroxyprogesterone | Concentration (µg/L) | 1.08 | 2.84 | 6.64 | 1.13 |  | 7.45 | RIA | 0.02-11.1 | 0.02 |  |
|  | **CV(%)** | 5.0 | 4.3 | 4.5 | 9.7 |  | 5.4 |  |  |  |  |
| Progesterone | Concentration (µg/L) | 0.158 | 1.47 | 54.6 | 0.158 | 1.47 | 54.6 | ECLIA | 0.05‑60 | 0.159 | 0.636 |
|  | **CV(%)** | 11.9 | 3.7 | 2.4 | 22.5 | 6.5 | 3.3 |  |  |  |  |
| Testosterone | Concentration (nmol/L) | 0.316 | 7.39 | 45.8 | 0.316 | 7.39 | 45.8 | ECLIA | 0.087‑52.0 | 0.087 | 0.416 |
|  | **CV(%)** | 14.8 | 2.8 | 2.1 | 18.1 | 3.2 | 2.5 |  |  |  |  |

Table 2: Performances of the routine methods (Precision, method used, measuring range, LOD and LOQ). Unavailable parameters for IA have been greyed-out.

| **Substance** | **Recovery(%) n=3. 3 days** | | | **Desirable biais (EFLM database)** |
| --- | --- | --- | --- | --- |
|  | **Level 1** | **Level 2** | **Level 3** |
|  | | | |
| Aldosterone | 0.1 | 0.25 | 1.03 | 12.6% |
|  | 101.33+/-2.65% | 103.56+/-9.62% | 99.29+/-3.55% |
| Corticosterone | 0.83 | 3.99 | 30.3 | 15% |
|  | 102.72+/-3.20% | 103.80+/-13.92% | 95.30+/-7.92% |
| Cortisol | 71.2 | 170 | 494 | 12.4% |
|  | 101.45+/-2.49% | 101.67+/-9.05% | 99.27+/-3.46% |
| Cortisone | 2.06 | 12.3 | 29.3 | *15%* |
|  | *109.61+/-8.54%** | 96.99+/-14.51% | 100.93+/-6.28% |
| 11-deoxycortisol | 0.26 | 1.38 | 9.14 | 9.5% |
|  | 99.66+/-3.89% | 101.22+/-9.37% | 100.42+/-3.78% |
| Androstenedione | 0.28 | 1.16 | 9.3 | 15% |
|  | 98.21+/-11.54% | 95.22+/-6.35% | 95.95+/-4.52% |
| DHEA | 1.99 | 11.6 | 38.5 | 15% |
|  | *96.16+/-3.50%* | *99.74+/-3.50%* | *99.37+/-2.03%* |
| DHEAS | 0.69 | 4.116 | 13.43 | 5.5% |
|  | 101.52+/-5.03% | 99.75+/-2.09% | 100.11+/-3.17% |
| Dihydrotestosterone | 0.08 | 0.37 | 1.06 | *15%* |
|  | *95.21+/-16.70%** | *106.11+/-16.39%** | 106.93+/-5.07% |
| Estradiol | 80 | 390 | 2460 | 5.0% |
|  | 98.75+/-7.07% | 99.68+/-5.35% | 98.62+/-2.35% |
| 17-Hydroxyprogesterone | 0.31 | 1.53 | 9.01 | 14.0% |
|  | 94.30+/-7.98% | 100.24+/-5.67% | 101.09+/-2.65% |
| Progesterone | 0.32 | 3.26 | 15.6 | 15% |
|  | 102.29+/-7.29% | 101.39+/-6.18% | 99.90+/-2.45% |
| Testosterone | 0.69 | 5.24 | 27.24 | 5.4% |
|  | 96.92+/-7.77% | 99.38+/-6.09% | 100.38+/-2.64% |

Table 3: Recovery obtained at the different concentration evaluated for the RTU kit. *Values outside the desirable specification according to EFLM database are shown in Italic.
